# Supplementary material for: Reaction mechanism and kinetics for ammonia synthesis on the Fe(211) reconstructed surface
Source: Royal Society of Chemistry journal article supplement (doi:10.1039/c9cp01611b), 2019-01-01
Supplement: c9cp01611b2.xlsx [file c9cp01611b2.xlsx]

## Sheet: 673K 1.5 torr
										PBE_D3_211	PBE_D3_211	PBE_D3_2.807
						Name				E(tot)	G	dG				ZPE			E (eV)
						H2(673K,15atm)				-6.77329	-7.2135				N2(673K,5atm)	0.15337		H addition	0.57
						N2(673K,5atm)				-16.6451	-17.6975				NH3(673K,0.2atm)	0.912085		ER hydrogenation	1.1
						NH3(673K,1.5torr)				-19.5444	-20.3018	-1.26563						H migration	0.9
						01_3N-NH2				-218.294	-219.295	0			Main Pathway
						TS_01_02_hydrogen-addition						0.686393
						02_3N-NH2-2H				-225.625	-226.392	0.116393
						TS_02_03_3N.NH2.2H				-224.816	-225.528	0.980142
						03_3N-NH3-H				-225.935	-226.655	-0.147216
						TS_03_04_NH3desorption				1.01237	-0.12 from ZPE'	0.745158
						04_3N-H+NH3(g)				-205.378	-206.533	-0.326525
						TS_04_05_3N-H+NH3(g)				-204.188	-205.593	0.6129
						05_2N-NH+NH3(g)				-205.412	-206.667	-0.460829
						TS_05_06_hydrogen-addition						-0.321537
						06_2N-NH-2H+NH3(g)				-213.394	-214.311	-0.891537
						TS_06_07_2N-NH-2H+NH3(g)				-212.051	-213.029	0.390663
						07_2N-NH2-H+NH3(g)				-212.686	-213.644	-0.22415
						TS_07_08_2N-NH2-H+NH3(g)				-212	-212.909	0.51096
						08_2N-NH3+NH3(g)				-212.515	-213.495	-0.0754455			See Alternate Pathway
						TS_08_09_NH3desorption				0.97861	-0.03 from ZPE'	0.873165
						09_2N+2NH3(g)				-191.992	-193.435	-0.317265
						10_2N-N2(top)+2NH3(g)				-209.45	-211.208	-0.392865
						TS_9_10_N2desorption(top)				0.812847	-0.02 from ZPE'	0.399982
						TS_10_11(top->bottom)				-208.847	-210.385	0.430729
						11_2N-N2 (bottom)+2NH3(g)				-209.007	-210.674	0.141092
						TS_09_11_N2desorption(bottom)				0.37006	-0.017 from ZPE'	0.494151
						TS_11_12_2N-N2 (bottom)				-208.955	-210.499	0.316347
						12_2N-N2 (final)+2NH3(g)				-209.244	-210.864	-0.0480615
						TS_09_12_N2 desorption(final)				0.606952	-0.03	0.52889
						TS_12_13_2N-N2(final) -> 4N (initial)				-208.463	-209.992	0.823122
						13_4N (initial) + 2NH3(g)				-209.378	-210.874	-0.0581545
						TS_13_14_4N(initial) -> 4N(secondary)				-209.046	-210.547	0.268004
						14_4N (secondary) +2NH3(g)				-210.833	-212.284	-1.46851
						TS_14_15_4N (secondary)->4N				-210.075	-211.57	-0.754231
						15_4N+2NH3(g)				-210.56	-212.034	-1.21836
						TS_15_16_ERhydrogenation						-0.118359
						16_3N-NH-H+2NH3(g)				-218.737	-219.787	-1.75803
						TS_16_17_hydrogen-migration						-0.858033
						17_3N-NH2+2NH3(g)				-218.29	-219.291	-1.26212
						TS_08_18_hydrogen-addition						0.686393
						18_2N-2H-NH3				-220.422	-221.016	-0.382746
						TS_18_19_NH3desorp				0.917392	-0.126869	0.407777
						19_2N-2H				-199.961	-201.278	-0.946945
						20_2N-2H-N2top				-217.575	-218.891	-0.861621
						TS_20_21_top				-216.511	-218.053	-0.0243522
						TS_19_20_N2desorption(top)				0.969277	-0.073054	0.0346028
						21_2N-2H-N2bottom				-217.162	-218.515	-0.48597
						TS_21_22_bottom				-216.974	-218.197	-0.167728
						TS_19_21_N2desorption(bottom)				0.555821	-0.080196	-0.0103452
						22_2N-2H-N2final				-217.188	-218.405	-0.375937
						TS_22_23_final				-216.445	-217.612	0.416569
						TS_19_22_N2desorption(final)				0.581794	-0.089612	0.116245
						23_4N-2H initial				-217.551	-218.605	-0.576321
						(goes to 24 spontaneously?)
						2N-4H				-207.935	-208.678	-1.133
						14_4N (ground) +2NH3(g)				-211.08	-212.523	-1.70725

## Sheet: 673K 1atm
										PBE_D3_211	PBE_D3_211	PBE_D3_2.807
						Name				E(tot)	G	dG				ZPE			E (eV)
						H2(673K,15atm)				-6.77329	-7.2135				N2(673K,5atm)	0.15337		H addition	0.57
						N2(673K,5atm)				-16.6451	-17.6975				NH3(673K,0.2atm)	0.912085		ER hydrogenation	1.1
						NH3(673K,1atm)				-19.5444	-19.9407	-0.543317						H migration	0.9
						01_3N-NH2				-218.294	-219.295	0			Main Pathway
						TS_01_02_hydrogen-addition						0.686393
						02_3N-NH2-2H				-225.625	-226.392	0.116393
						TS_02_03_3N.NH2.2H				-224.816	-225.528	0.980142
						03_3N-NH3-H				-225.935	-226.655	-0.147216
						TS_03_04_NH3desorption				1.01237	-0.12 from ZPE'	0.745158
						04_3N-H+NH3(g)				-205.378	-206.533	0.0346316
						TS_04_05_3N-H+NH3(g)				-204.188	-205.593	0.974056
						05_2N-NH+NH3(g)				-205.412	-206.667	-0.0996723
						TS_05_06_hydrogen-addition						0.0396194
						06_2N-NH-2H+NH3(g)				-213.394	-214.311	-0.530381
						TS_06_07_2N-NH-2H+NH3(g)				-212.051	-213.029	0.75182
						07_2N-NH2-H+NH3(g)				-212.686	-213.644	0.137007
						TS_07_08_2N-NH2-H+NH3(g)				-212	-212.909	0.872117
						08_2N-NH3+NH3(g)				-212.515	-213.495	0.285711			See Alternate Pathway
						TS_08_09_NH3desorption				0.97861	-0.03 from ZPE'	1.23432
						09_2N+2NH3(g)				-191.992	-193.435	0.405049
						10_2N-N2(top)+2NH3(g)				-209.45	-211.208	0.329449
						TS_9_10_N2desorption(top)				0.812847	-0.02 from ZPE'	1.1223
						TS_10_11(top->bottom)				-208.847	-210.385	1.15304
						11_2N-N2 (bottom)+2NH3(g)				-209.007	-210.674	0.863405
						TS_9_11_N2desorption(bottom)				0.37006	-0.017 from ZPE'	1.21646
						TS_11_12_2N-N2 (bottom)				-208.955	-210.499	1.03866
						12_2N-N2 (final)+2NH3(g)				-209.244	-210.864	0.674252
						TS_9_12_N2 desorption(final)				0.606952	-0.03	1.2512
						TS_12_13_2N-N2(final) -> 4N (initial)				-208.463	-209.992	1.54544
						13_4N (initial) + 2NH3(g)				-209.378	-210.874	0.664159
						TS_13_14_4N(initial) -> 4N(secondary)				-209.046	-210.556	0.981479
						14_4N (secondary) +2NH3(g)				-210.833	-212.284	-0.746201
						TS_14_15_4N (secondary)->4N				-210.075	-211.57	-0.0319177
						15_4N+2NH3(g)				-210.56	-212.034	-0.496046
						TS_15_16_Erhydrogenation						0.603954
						16_3N-NH-H+2NH3(g)				-218.737	-219.787	-1.03572
						TS_16_17_hydrogen-migration						-0.13572
						17_3N-NH2+2NH3(g)				-218.29	-219.291	-0.539809
						TS_08_18_hydrogen-addition						0.686393
						18_2N-2H-NH3				-220.422	-221.016	-0.0215892
						TS_18_19_NH3desorp				0.917392	-0.126869	0.768934
						19_2N-2H				-199.961	-201.278	-0.224632
						20_2N-2H-N2top				-217.575	-218.891	-0.139307
						TS_20_21_top				-216.511	-218.053	0.697961
						TS_19_20_N2desorption(top)				0.969277	-0.073054	0.756916
						21_2N-2H-N2bottom				-217.162	-218.515	0.236343
						TS_21_22_bottom				-216.974	-218.197	0.554585
						TS_19_21_N2desorption(bottom)				0.555821	-0.080196	0.711968
						22_2N-2H-N2final				-217.188	-218.405	0.346376
						TS_22_23_final				-216.445	-217.612	1.13888
						TS_19_22_N2desorption(final)				0.581794	-0.089612	0.838558
						23_4N-2H initial				-217.551	-218.605	0.145992
						(goes to 24 spontaneously?)
						2N-4H				-207.935	-208.678	-0.410686
						14_4N-ground +2NH3(g)				-211.08	-212.523	-0.984935

## Sheet: Small Molecule
					H2_D3	T =	673.15 K							T =	723.15 K						H2_D3	T =	823.15 K
							U	Cv	S	H	G	ln(Q)			U	Cv	S	H	G	ln(Q)			U	Cv	S	H	G	ln(Q)
							---------	---------	---------	---------	---------	---------			---------	---------	---------	---------	---------	---------			---------	---------	---------	---------	---------	---------
						trans.	2.007	2.981	32.126	3.344	-18.281	13.6665		trans.	2.156	2.981	32.482	3.593	-19.897	13.8456		trans.	2.454	2.981	33.126	4.089	-23.178	14.1694
						rot.	1.338	1.987	4.709	1.338	-1.832	1.36951		rot.	1.437	1.987	4.851	1.437	-2.071	1.44116		rot.	1.636	1.987	5.108	1.636	-2.569	1.57068
						vib.	0.001	0.015	0.002	0.001	0	9e-05		vib.	0.002	0.025	0.003	0.002	0	0.00017		vib.	0.006	0.056	0.008	0.006	-0.001	0.00048
						elec.	0	0	0	0	0	0		elec.	0	0	0	0	0	0		elec.	0	0	0	0	0	0
						total	3.345	4.983	36.837	4.683	-20.114	15.0361		total	3.595	4.993	37.336	5.032	-21.968	15.2869		total	4.095	5.024	38.242	5.731	-25.748	15.7406
					N2_D3	T =	673.15 K							T =	723.15 K						N2_D3	T =	823.15 K
							U	Cv	S	H	G	ln(Q)			U	Cv	S	H	G	ln(Q)			U	Cv	S	H	G	ln(Q)
							---------	---------	---------	---------	---------	---------			-----	---------	---------	---------	---------	---------			---------	---------	---------	---------	---------	---------
						trans.	2.007	2.981	39.97	3.344	-23.562	17.6137		trans.	2.156	2.981	40.326	3.593	-25.569	17.7928		trans.	2.454	2.981	40.969	4.089	-29.635	18.1166
						rot.	1.338	1.987	11.519	1.338	-6.417	4.79682		rot.	1.437	1.987	11.662	1.437	-6.996	4.86847		rot.	1.636	1.987	11.919	1.636	-8.176	4.99799
						vib.	0.044	0.33	0.078	0.044	-0.009	0.00646		vib.	0.062	0.407	0.104	0.062	-0.013	0.00916		vib.	0.111	0.564	0.167	0.111	-0.027	0.01627
						elec.	0	0	0	0	0	0		elec.	0	0	0	0	0	0		elec.	0	0	0	0	0	0
						total	3.388	5.298	51.567	4.726	-29.987	22.417		total	3.655	5.375	52.092	5.092	-32.579	22.6704		total	4.2	5.532	53.056	5.836	-37.837	23.1309
					NH3_D3	T =	673.15 K							T =	723.15 K						NH3_D3	T =	823.15 K
							U	Cv	S	H	G	ln(Q)			U	Cv	S	H	G	ln(Q)			U	Cv	S	H	G	ln(Q)
							---------	---------	---------	---------	---------	---------			---------	---------	---------	---------	---------	---------			---------	---------	---------	---------	---------	---------
						trans.	2.007	2.981	38.487	3.344	-22.563	16.8672		trans.	2.156	2.981	38.843	3.593	-24.496	17.0463		trans.	2.454	2.981	39.486	4.089	-28.414	17.3701
						rot.	2.007	2.981	13.935	2.007	-7.374	5.51233		rot.	2.156	2.981	14.149	2.156	-8.076	5.6198		rot.	2.454	2.981	14.535	2.454	-9.51	5.81408
						vib.	0.647	3.043	1.293	0.647	-0.224	0.16716		vib.	0.808	3.397	1.524	0.808	-0.294	0.20457		vib.	1.182	4.08	2.007	1.182	-0.47	0.28751
						elec.	0	0	0	0	0	0		elec.	0	0	0	0	0	0		elec.	0	0	0	0	0	0
						total	4.66	9.005	53.714	5.997	-30.16	22.5467		total	5.119	9.359	54.515	6.556	-32.866	22.8707		total	6.089	10.041	56.028	7.725	-38.394	23.4717
name	T	P	ZPE	S	H	total	total(eV)	E	G	functional
H2	673	15	6.247	36.837	4.683	-13.8613	-0.601088	-6.77329	-7.21733	D3
N2	673	5	3.375	51.567	4.726	-26.6036	-1.15365	-16.6451	-17.7055	D3
NH3	673	1	21.13	53.714	5.997	-9.02252	-0.391257	-19.5444	-19.9356	D3
H2	673	15	6.384	36.798	4.683	-13.6981	-0.594009	-6.75962	-7.19658	PBE
N2	673	5	3.513	51.515	4.719	-26.4376	-1.14645	-16.6033	-17.6564	PBE
NH3	673	1	21.619	53.614	5.972	-8.49122	-0.368217	-19.5163	-19.8845	PBE
NH3	673	0.00197368	21.619	53.614	5.972	-8.49122	-0.368217	-19.5163	-20.2457	PBE	1.5 torr
NH3	673	0.2	21.0336	53.818	6.047	-9.13891	-0.396304	-19.5444	-20.034	D3	1.5 torr
H2	730	150	6.247	37.336	5.032	-15.9763	-0.692803	-6.77329	-7.15089	D3
N2	730	50	3.375	52.092	5.092	-29.5602	-1.28186	-16.6451	-17.6809	D3
NH3	730	1	21.13	54.515	6.556	-12.1099	-0.525142	-19.5444	-20.0695	D3
NH3	730	0.00197368	21.619	53.614	5.972	-11.5472	-0.500739	-19.5163	-20.4088	D3
H2	730	150	6.384	37.363	5.079	-15.812	-0.685679	-6.75962	-7.1301	PBE
N2	730	50	3.513	52.105	5.133	-29.3906	-1.27451	-16.6033	-17.6317	PBE
NH3	730	1	21.619	54.513	6.602	-11.5735	-0.501878	-19.5163	-20.0182	PBE
